# Supplementary material
Source: publisher site journal article supplement (https://www.dovepress.com/article/500722)
Supplement: Supplementary file 1 [file get_supplementary_file.php]

Supplementary Table 1 Primer sequences

| Gene | 5’-3’ Primer sequence |
| --- | --- |
| *IL-1β* | F: GACTTCACCATGGAACCCGT |
| R: CAGGGAGGGAAACACACGTT |
| *TNF-α* | F: GGCTTTCGGAACTCACTGGA |
| R: GGGAACAGTCTGGGAAGCTC |
| *β-actin* | F: GCGCAAGTACTCTGTGTGGA |
| R: AGGGTGTAAAACGCAGCTCAG |
